# Supplementary material for: Fluorinated polymeric insulating layer surface advancement by fluorine based cross-linking for high-performance organic electronic applications
Source: Royal Society of Chemistry journal article supplement (doi:10.1039/d4tc03296a), 2024-01-01
Supplement: d4tc03296a1.pdf [file d4tc03296a1.pdf]

1 **Supplementary Data**

2 **Fluorinated polymeric insulating layer surface advancement by**  
3 **fluorine based cross-linking for high-performance organic**  
4 **electronic applications**

5 Heqing Ye<sup>1,2,a</sup>, Hyeok-jin Kwon<sup>3,a</sup>, Ka Yeon Ryu<sup>4,5a</sup>, Yufei Lu<sup>1</sup>, Hyun Ho Choi<sup>6</sup>, Sang Yong  
6 Nam<sup>6</sup>, Zixiao Feng<sup>1</sup>, Jeongwan Park<sup>4</sup>, Jaewon Mo<sup>7</sup>, Hongjian Zhang<sup>1\*</sup>, Jihoon Lee<sup>7\*</sup>, Hoyoul  
7 Kong<sup>4,5\*</sup>, Se Hyun Kim<sup>2,\*</sup>

8 <sup>1</sup>School of Flexible Electronics (SoFE) and Henan Institute of Flexible Electronics (HIFE),  
9 Henan University, 379 Mingli Road, Zhengzhou 450046, China

10 <sup>2</sup>School of Chemical Engineering, Konkuk University, Seoul 05029, Korea

11 <sup>3</sup>Department of Industrial Chemistry, Pukyong National University, Busan 48513, Republic of  
12 Korea

13 <sup>4</sup>Department of Chemistry and Research Institute of Nature Science, Gyeongsang National  
14 University, Jinju 52828, Republic of Korea

15 <sup>5</sup>Research Institute of Molecular Alchemy, Gyeongsang National University, Jinju 52828,  
16 Republic of Korea.

17 <sup>6</sup>Research Institute for Green EnergyConvergence Techonology, Gyeongsang National  
18 University, Jinju 52828, Republic of Korea

19 <sup>7</sup>Department of Polymer Science and Engineering & Department of IT·Energy Convergence  
20 (BK21 Four), Korea National University of Transportation, Chungju, 27469, Republic of  
21 Korea

22

23 **Corresponding Authors**

1 \*E-mails: ifehjzhang@henu.edu.cn (H. Zhang); jihoonli@ut.ac.kr (J. Lee);

2 hoyoulkong@gnu.ac.kr (H. Kong), shkim97@konkuk.ac.kr, (S. H. Kim)

3 <sup>a</sup>These authors are equally contributed

4

5 **Table S1.** Synthesis ratio of fluorinated acrylate polymer.

|               | <b>MMA</b>  | <b>BA</b>     | <b>HEA-suc</b> | <b>Ca</b>     | <b>HFMA</b>    |
|---------------|-------------|---------------|----------------|---------------|----------------|
| <b>MBHCaF</b> | <b>1 eq</b> | <b>0.5 eq</b> | <b>0.5 eq</b>  | <b>0.5 eq</b> | <b>0.06 eq</b> |

6

7

8

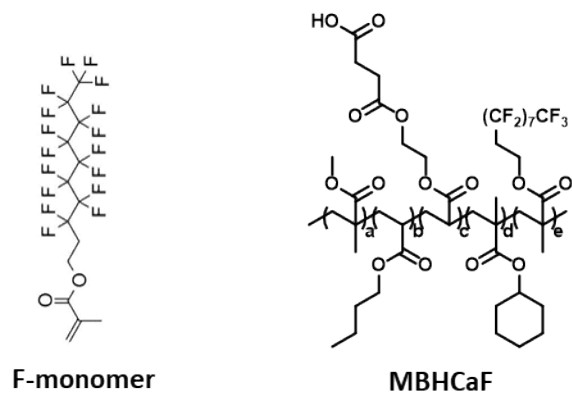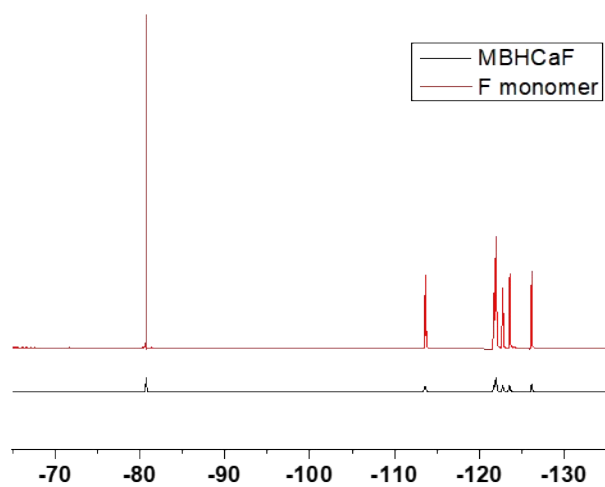

1

2 **Fig. S1.**  $^{19}\text{F}$  NMR data of F-monomer and MBHCAF

3

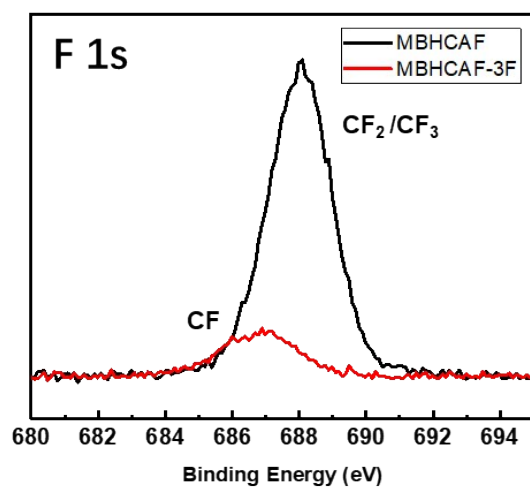

4

3

1 **Fig. S2.** F 1s XPS spectra of MBHCaF and MBHCaF-3F

2

3

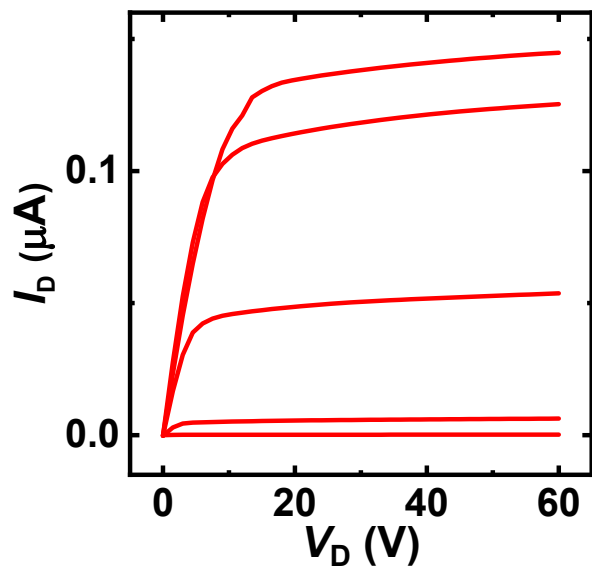

4

5 **Fig. S3.** Output curve of PTCDI-C<sub>13</sub> OFETs with MBHCaF layers

6

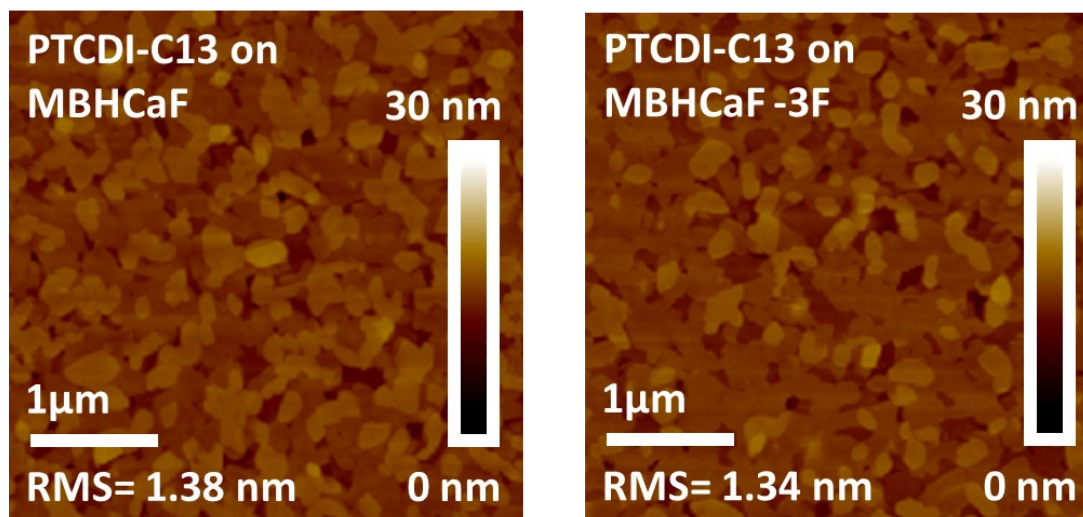

7

8 **Fig. S4.** AFM image of PTCDI-C<sub>13</sub> on polymeric dielectrics

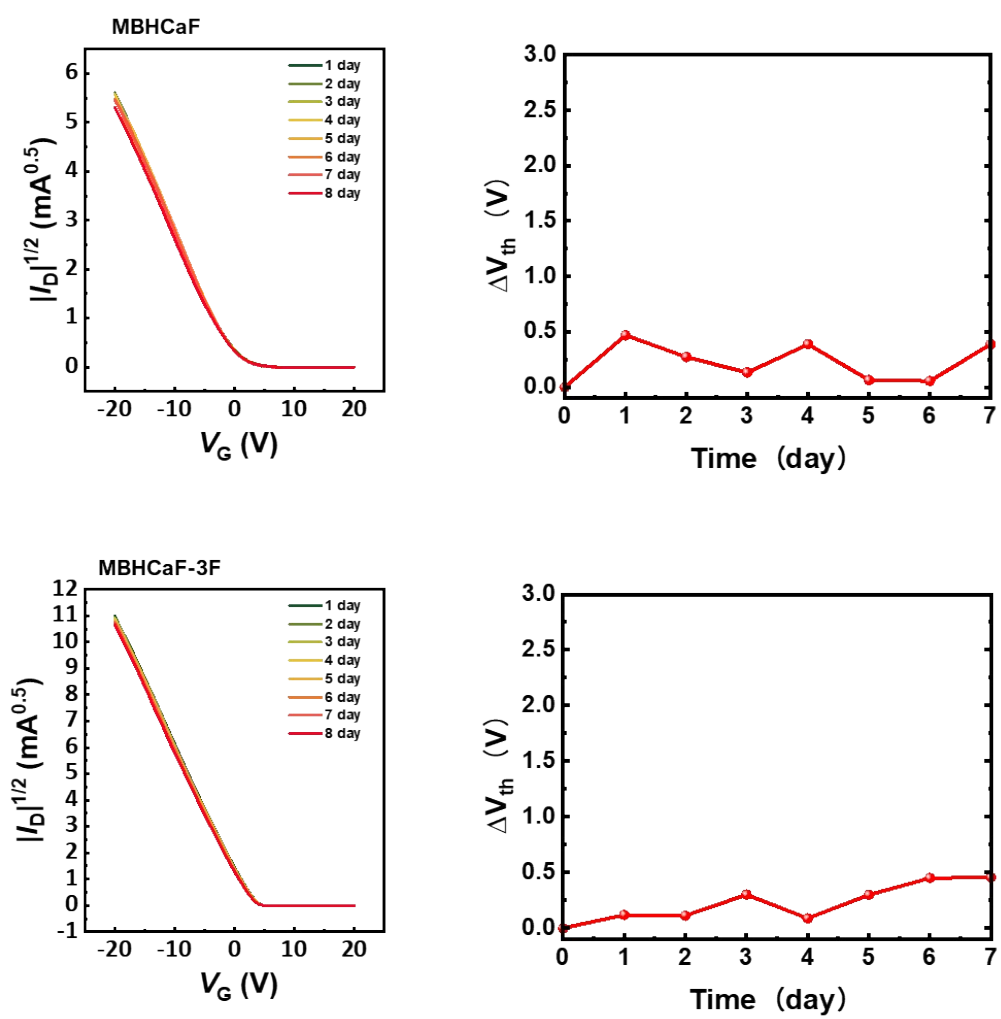

1

2 **Fig. S5.** Bias-stress stability transfer curve data of C<sub>10</sub>-DNTT OFETs with  
 3 MBHCaF/MBHCaF-3F layers for long-term.

4

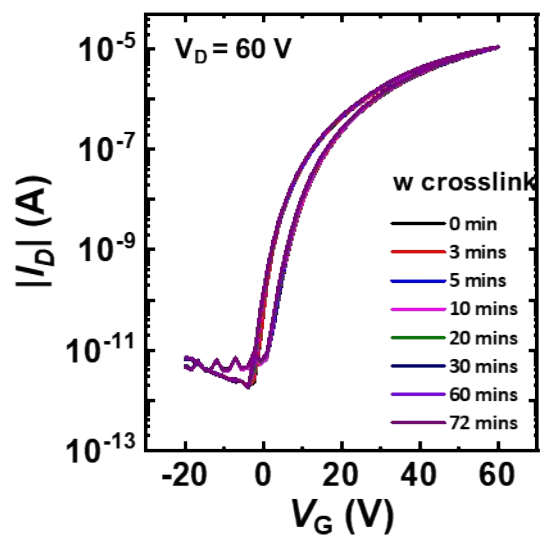

1

2 **Fig. S6.** Bias-stress stability transfer curve data of PTCDI-C13 OFETs with MBHCaF-3F  
3 layers

4

5

6

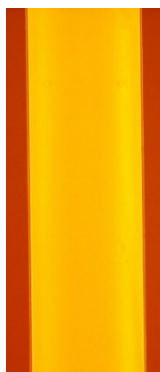

7

8 **Fig. S7.** OM image of printed layer (MBHCaF-3F)

9

10

11
